# Supplementary material for: Laser-Synthesized 2D-MoS2 Nanostructured Photoconductors
Source: MDPI journal article supplement (doi:10.3390/mi14051036), 2023-05-12
Supplement: s1 [file s1]

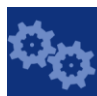

## Supplementary material

### Laser irradiation parameters

Table S1. Laser scanning parameters

| Figure | Liquid precursor concentration, mM | Laser intensity, MW/cm <sup>2</sup> | Scanning speed, mm/s | Comments                                      |
|--------|------------------------------------|-------------------------------------|----------------------|-----------------------------------------------|
| 1a     | 24                                 | 0.89                                | 9                    |                                               |
| 1b     | 24                                 | 0.89                                | 10                   |                                               |
| 1c     | 24                                 | 0.89                                | 10                   | beam polarization is along scanning direction |
| 1d     | 48                                 | 0.89                                | 19.5                 |                                               |
| 2a     | 24                                 | 0.89                                | 10                   |                                               |
| 2b     | 24                                 | 0.89                                | 10                   |                                               |
| 3a     | 48                                 | 0.51                                | 19.5                 |                                               |
| 3b     | 48                                 | 0.64                                | 19.5                 |                                               |
| 3c     | 48                                 | 0.76                                | 19.5                 |                                               |
| 3d     | 48                                 | 0.89                                | 19.5                 |                                               |

LIPSS in WS<sub>2</sub>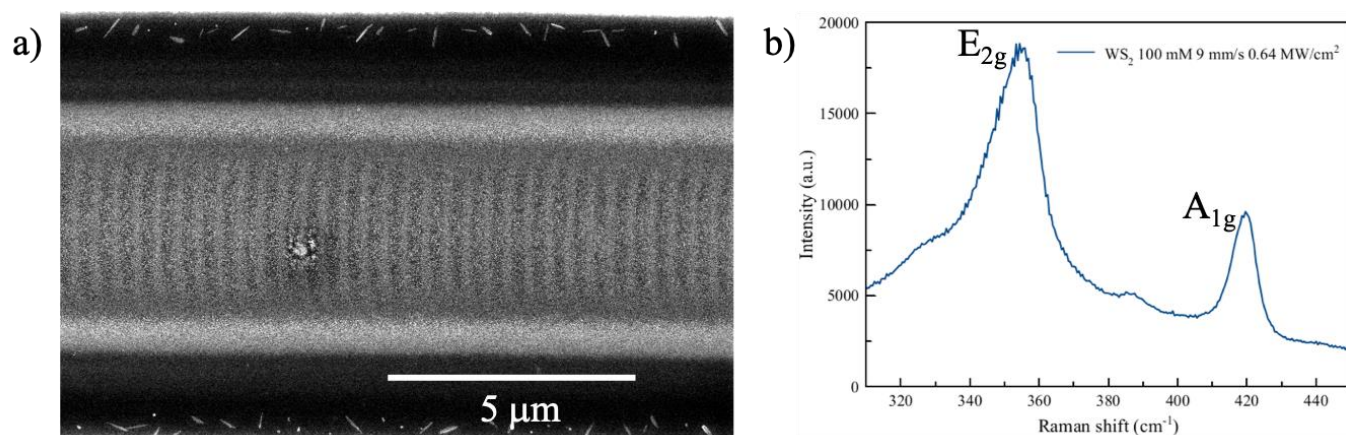

**Figure S1.** a) SEM image of LIPSS formation in a laser synthesised WS<sub>2</sub> track, using 532 nm laser radiation b) corresponding Raman spectrum showing the out-of-plane (A<sub>1g</sub>) and in-plane (E<sub>2g</sub>) vibrational modes. For more detailed Raman spectroscopy analysis of laser-synthesised TMDs see: O. A. Abbas, *et al.*, *Sci. Rep.* **2021**, 11, 5211., and A.V. Averchenko, *et al.*, *Mater. Today Adv.* **2023**, 17, 100351 (references 7, 8 in the main text).

### AFM topography.

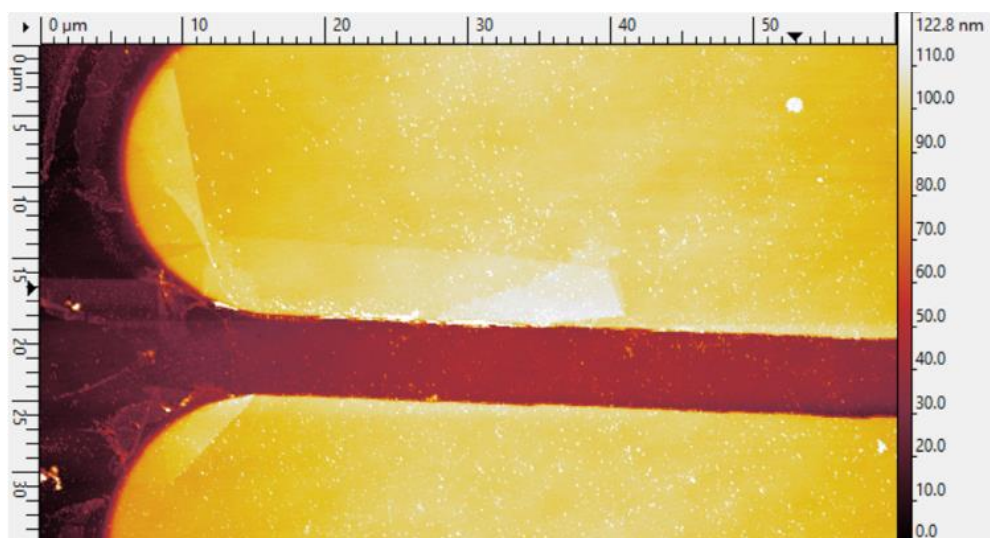

**Figure S2.** a) AFM image of the photoconductive device showing the two gold contacts that have been deposited either side of the film track. The channel length (gap between gold contacts) is  $\sim 7 \mu\text{m}$ .

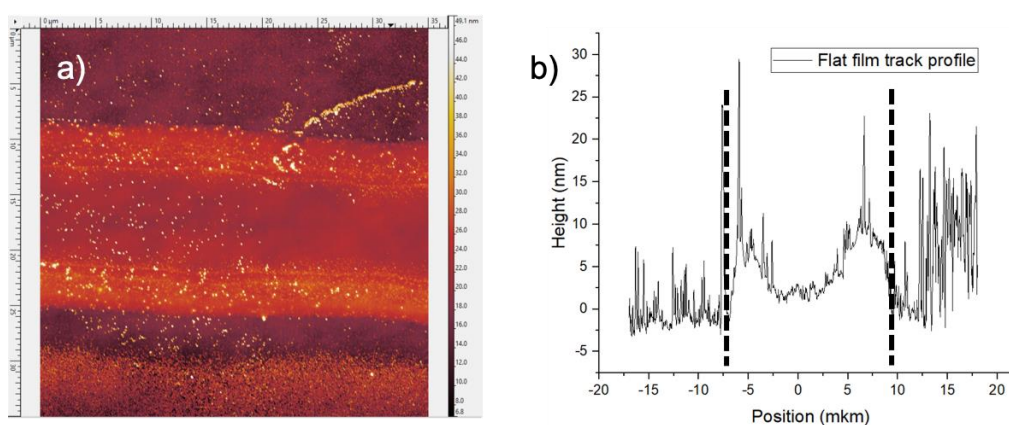

**Figure S3.** a) AFM image for single laser MoS2 track exhibits a continuous film without any LIPSS features, b) Profile taken across the track (the thickness profile of the track is contained between dash lines).

### Raman spectroscopy.

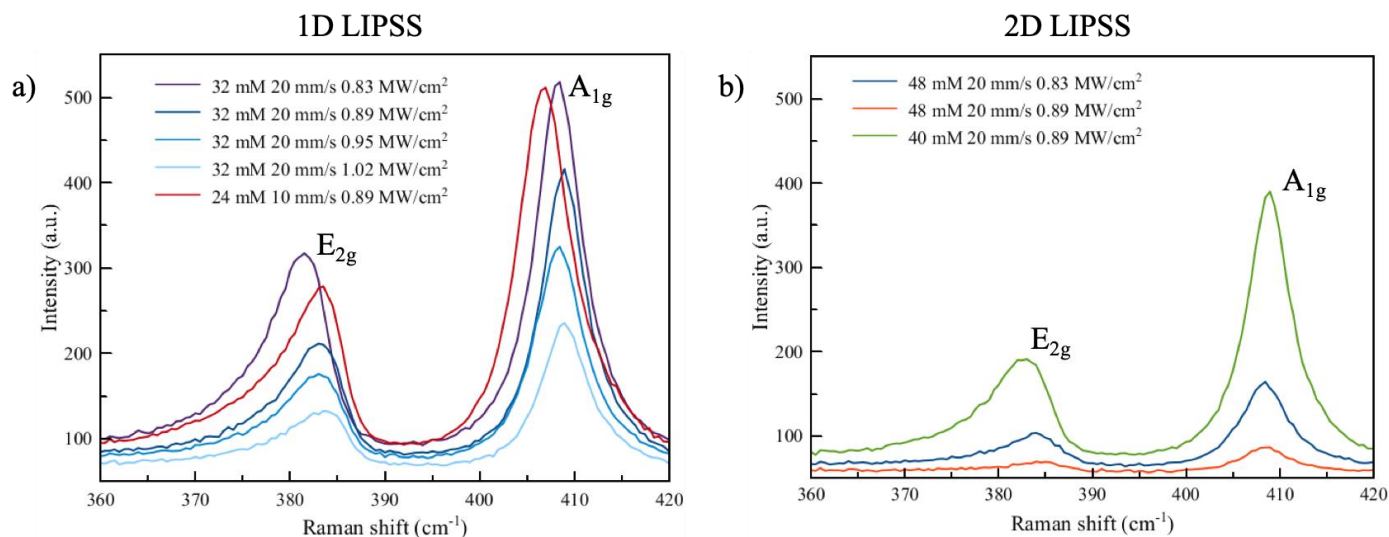

**Figure S4.** Raman spectra of nanostructured MoS<sub>2</sub> tracks corresponding to a) 1D LIPSS and b) 2D LIPSS. The Raman spectra were acquired from the centre of laser synthesised tracks, which were produced using various precursor concentrations and laser intensities (as shown in the legend of the graphs). The variety of synthesis parameters result in different film characteristics, i.e. thickness, which is reflected in the shifts of the A<sub>1g</sub> and E<sub>2g</sub> peaks, which correspond to out-of-plane and in-plane vibrations respectively. For more detailed Raman spectroscopy analysis of laser-synthesised TMDs see: O. A. Abbas, *et al.*, *Sci. Rep.* **2021**, *11*, 5211., and A.V. Averchenko, *et al.*, *Mater. Today Adv.* **2023**, *17*, 100351 (references 7, 8 in the main text).

## SEM

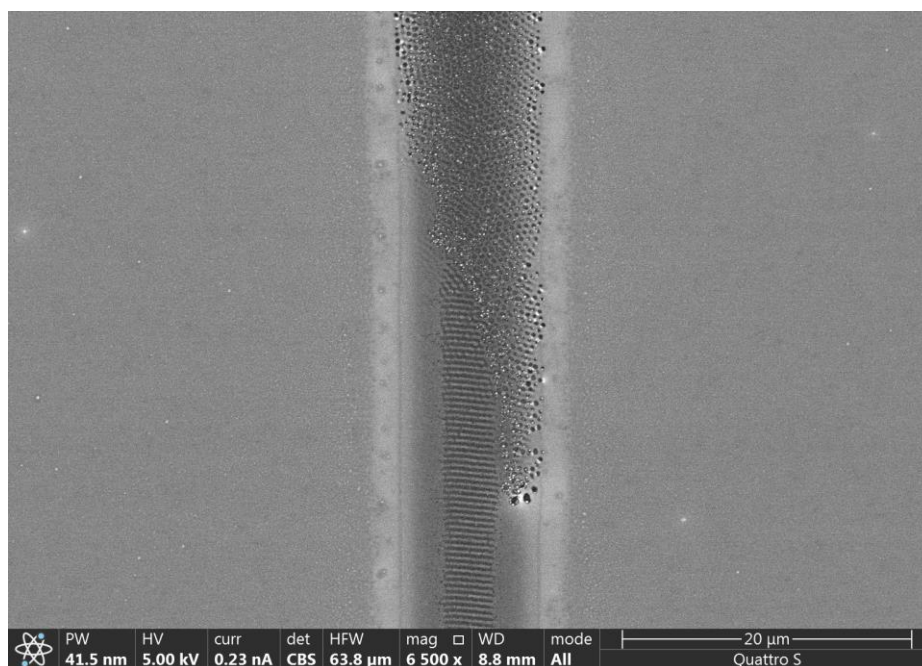

**Figure S5.** 1D to 2D LIPSS switching caused by a defect of the film (scanning direction is from bottom to top).

## AFM scan of nanostructured photodetector

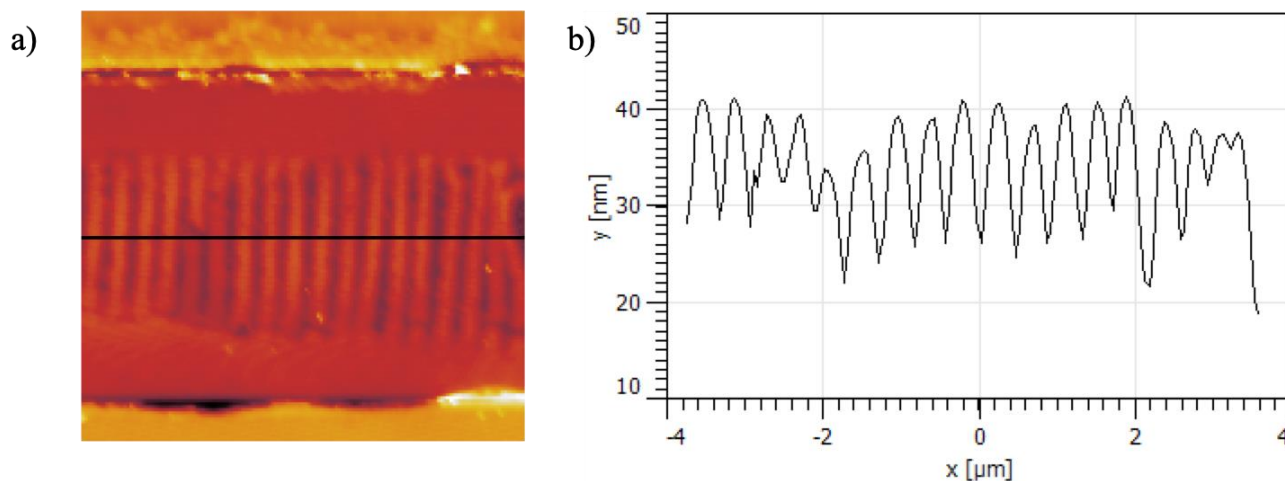

**Figure S6.** a) AFM scan of a section of a nanostructured photodetector consisting of MoS<sub>2</sub> nanoribbons, b) a topography contour extracted from the AFM image.
